# Supplementary material for: Moyamoya Vasculopathy in Neurofibromatosis Type 1 Pediatric Patients: The Role of Rare Variants of RNF213
Source: MDPI journal article supplement (doi:10.3390/cancers15061916), 2023-03-22
Supplement: s1 [file s1]

## Supplementary data S1

### NF1 cDNA PCR primers

| FRAGMENT | FW                        | REV                         |
|----------|---------------------------|-----------------------------|
| F1       | ACAGACCCTCTCCTTGCCTC      | GCAACTGTTTGACCAGCATCG       |
| F2       | TGAGCACAACAAGGAATGTCTAATC | TGGTACAGTTTTGTAAATTCATCTGG  |
| F3       | ACGACTCCTGAAGGAAACAGC     | CTGACTGCCTCTTGAGAATGG       |
| F4       | TGGCCATGGAGGAAGTAGG       | GGTGTGCTCCACAACCTTG         |
| F5       | ATCTGCCTGGCTCAGAATTC      | CAGAGCCTCCATTGCTTCC         |
| F6       | ATTACAGGGCTCGTCCAACTG     | AGTTTGGTCTGGGCTTGTCG        |
| F7       | ACGGGGTAGGATGTGATATTCC    | TCCCAAGCCTCAGTGTTTCC        |
| F8       | GGAAGCAGATATCCGGTGTGG     | GGATACAGAGCAGGACTCAA        |
| F9       | CATGGGTCCAGTCAGTGAAC      | GCCTGGTCCAAATCTCTTGT        |
| F10      | GGGCAAGCTAGCATTGAAAC      | CCACCTGTTTGCGCACTTTC        |
| F11      | GTCTTACAAGAGATTTGGACCA    | GGAACCACATTGGCCAGAGC        |
| F12      | GCACAGAATTTGACACACTTGC    | AGGTTCCGCTGGTTTTCC          |
| F13A     | TCTCTTCCGAGGCAACAGC       | TTTATTCAGTAGGGAGTGGCA       |
| F13B     | AACTTGCCACTCCCTACTG       | GCAAGCACATTGCCGTCCT         |
| F14      | AATCCTGCCATTGTCTCACC      | GGCTGGACCAGTGTGTATCT        |
| F15      | CCAGCAACAGGGATCATAAAGC    | CTTTGAGGCCAGTCAGCAGC        |
| F16      | CTGGCTTTGCTTACGACAACG     | GGCCGAATCTTGGTGTGTTGG       |
| F17      | TTCACCTTAACCATTGCAAACC    | GGTGTTTCAATTCAATACTAGATTTGC |
| F18      | CCAATGAGCCACACCTCACG      | GGACAGCATCAGCATGTAGCG       |
| F19      | ATTGGTTTCAAGCAAGGTTATTG   | TGCATGCCTCCATGATCTCC        |
| F20      | ACAGGTCATTCTCTCCTGGC      | TCCGGATTGCCATAAATACTTCC     |
| F21      | TGTGCTGCAGCTTGATGAGG      | TTGGATAGGTGGCTGCAAGG        |
| F22      | CATTCATCATGGTGACCCTTCC    | GAAACACAACACTGGCCTCTGC      |
| F23      | GCGCTGCTTCTTACTGTTCTAGC   | GCTGGGAAGTTGCAAGTGAGG       |
| F24      | TCTTGATGCCTTGATTGACACG    | AAGGACAGGGAAGGGGTCAC        |
